# Supplementary material for: Zygomatic Implants Research: A Scientometric Analysis from 1990 to 2021
Source: MDPI journal article supplement (doi:10.3390/prosthesis5010016), 2023-02-07
Supplement: s1 [file s1]

Archive with 1 entries (1 files):
- prosthesis-2141480-supplementary.pdf
