# Supplementary material for: Zygomatic Implants Research: A Scientometric Analysis from 1990 to 2021
Source: MDPI journal article supplement (doi:10.3390/prosthesis5010016), 2023-02-07
Supplement: s1 [file s1 › prosthesis-2141480-supplementary.pdf]

**Table S1: complete list of most productive Countries.**

| <b>Countries/Regions</b> | <b>Record Count</b> |
|--------------------------|---------------------|
| USA                      | 139                 |
| ITALY                    | 71                  |
| SPAIN                    | 65                  |
| BRAZIL                   | 58                  |
| PEOPLES R CHINA          | 52                  |
| GERMANY                  | 34                  |
| SWEDEN                   | 30                  |
| TURKEY                   | 29                  |
| ENGLAND                  | 27                  |
| BELGIUM                  | 22                  |
| INDIA                    | 22                  |
| JAPAN                    | 22                  |
| NETHERLANDS              | 18                  |
| AUSTRIA                  | 14                  |
| PORTUGAL                 | 13                  |
| CANADA                   | 12                  |
| SWITZERLAND              | 11                  |
| FRANCE                   | 10                  |
| SOUTH KOREA              | 10                  |
| AUSTRALIA                | 9                   |
| CHILE                    | 8                   |
| EGYPT                    | 8                   |
| ROMANIA                  | 8                   |
| FINLAND                  | 7                   |
| ISRAEL                   | 7                   |
| TAIWAN                   | 7                   |
| COLOMBIA                 | 6                   |

|              |   |
|--------------|---|
| SAUDI ARABIA | 6 |
| DENMARK      | 5 |
| MALAYSIA     | 5 |
| POLAND       | 5 |
| SOUTH AFRICA | 5 |
| RUSSIA       | 4 |
| WALES        | 4 |
| INDONESIA    | 3 |
| IRAN         | 3 |
| KUWAIT       | 3 |
| SCOTLAND     | 3 |
| COSTA RICA   | 2 |
| ECUADOR      | 2 |
| GREECE       | 2 |
| HUNGARY      | 2 |
| IRELAND      | 2 |
| LITHUANIA    | 2 |
| MEXICO       | 2 |
| NORWAY       | 2 |
| PAKISTAN     | 2 |
| PERU         | 2 |
| SERBIA       | 2 |
| VENEZUELA    | 2 |
| ALBANIA      | 1 |
| BULGARIA     | 1 |
| LEBANON      | 1 |
| SUDAN        | 1 |
| SYRIA        | 1 |
| THAILAND     | 1 |
| YEMEN        | 1 |

**Table S2: complete list of funding agencies.**

| <b>Funding Agencies</b>                                                                                                                  | <b>Record Count</b> |
|------------------------------------------------------------------------------------------------------------------------------------------|---------------------|
| National Natural Science Foundation Of China Nsfc                                                                                        | 17                  |
| National Institutes Of Health Nih Usa                                                                                                    | 14                  |
| United States Department Of Health Human Services                                                                                        | 14                  |
| Combined Engineering And Medical Project Of Shanghai Jiao Tong University                                                                | 11                  |
| Nih National Institute Of Dental Craniofacial Research Nidcr                                                                             | 9                   |
| Science Technology Commission Of Shanghai Municipality Stcsm                                                                             | 9                   |
| Integrated Fund Project Of Ninth People S Hospital                                                                                       | 5                   |
| Conselho Nacional De Desenvolvimento Cientifico E Tecnologico Cnpq                                                                       | 4                   |
| Ministry Of Education China                                                                                                              | 4                   |
| National Key R D Program Of China                                                                                                        | 4                   |
| Ninth People S Hospital Affiliated To Shanghai Jiao Tong University School Of Medicine Multi Disciplinary Team Clinical Research Project | 4                   |
| Nobel Biocare Services Ag                                                                                                                | 4                   |
| Research To Prevent Blindness Rpb                                                                                                        | 4                   |
| Ministry Of Science And Technology China                                                                                                 | 3                   |
| Science And Technology Ministry                                                                                                          | 3                   |
| Young Top Notch Talent Support Scheme From Anhui Medical University                                                                      | 3                   |
| Anhui Province Funds For Distinguished Young Scientists                                                                                  | 2                   |
| Beijing Natural Science Foundation                                                                                                       | 2                   |
| Bsky                                                                                                                                     | 2                   |
| Clinical Research Plan Of Shdc                                                                                                           | 2                   |
| Coordenacao De Aperfeicoamento De Pessoal De Nivel Superior Capes                                                                        | 2                   |
| Gorthon Foundation                                                                                                                       | 2                   |

|                                                                                                                              |   |
|------------------------------------------------------------------------------------------------------------------------------|---|
| Integrated Fund Project Of The Ninth People S Hospital                                                                       | 2 |
| Ministry Of Education Universities And Research Miur                                                                         | 2 |
| Nih National Eye Institute Nei                                                                                               | 2 |
| Shanghai Jiao Tong University Foundation On Medical And Technological Joint Science Research                                 | 2 |
| Am Cir Project                                                                                                               | 1 |
| Anhui Medical University                                                                                                     | 1 |
| Ankhor Dental Lab                                                                                                            | 1 |
| Aocmf                                                                                                                        | 1 |
| Arditi Agencia Regional Para O Desenvolvimento Da Investigacao Tecnologia E Inovacao                                         | 1 |
| Australian Research Council                                                                                                  | 1 |
| Basic Research Program Of Sichuan Province                                                                                   | 1 |
| Basic Science Research Program Through The National Research Foundation Of Korea Ministry Of Education                       | 1 |
| Basic Science Research Program Through The National Research Foundation Of Korea Nrf Ministry Of Science Ict Future Planning | 1 |
| Bertalli Family Foundation                                                                                                   | 1 |
| Biomodeling Laboratory Fitts Department Of Industrial And Systems Engineering North Carolina State University                | 1 |
| Boston Scientific                                                                                                            | 1 |
| British Orthodontic Society Uk                                                                                               | 1 |
| British Society Of Paediatric Dentistry Uk                                                                                   | 1 |
| British Society Of Periodontology Uk                                                                                         | 1 |
| Canadian Dental Hygienists Association Canada                                                                                | 1 |
| Cgbio Inc                                                                                                                    | 1 |
| Chang Gung Memorial Hospital                                                                                                 | 1 |
| Clinest Clinical Center Of Research In Stomatology                                                                           | 1 |
| Cochrane Oral Health Group Global Alliance Uk                                                                                | 1 |
| College Of Veterinary Medicine Clinical Initiative                                                                           | 1 |
| Company Neodent Curitiba Pr Brazil                                                                                           | 1 |
| Consiliul National Al Cercetarii Stiintifice Cncs                                                                            | 1 |
| Cooperated Foundation Of Medical And Engineering Science Of Shanghai Jiaotong University                                     | 1 |
| Cultivate Scientific Research Excellence Programs Of Higher Education Institutions In Shanxi                                 | 1 |

|                                                                                                                                            |   |
|--------------------------------------------------------------------------------------------------------------------------------------------|---|
| Department Of Oral And Maxillofacial Surgery Of The International University Of Catalonia Campus Sant Cugat Barcelona Spain                | 1 |
| Department Of Oral Implantology And Prosthetic Dentistry                                                                                   | 1 |
| Department Of Oral Surgery University Of Murcia Murcia Spain                                                                               | 1 |
| Department Of Surgery Dentistry Paediatrics And Gynaecology Dipscomi                                                                       | 1 |
| Department Of Surgery Dentistry Paediatrics And Gynaecology Dipscomi University Of Verona                                                  | 1 |
| Department Of Surgery Dentistry Pediatrics And Gynecology Of University Of Verona                                                          | 1 |
| Disaster And Safety Management Institute Ministry Of Public Safety And Security Of Korean Government                                       | 1 |
| Division Of Plastic And Reconstructive Surgery Of Shanghai Ninth People S Hospital                                                         | 1 |
| Dr Nasser Ibrahim Al Rashid Orbital Vision Research Fund                                                                                   | 1 |
| Fct Fundacao Para A Ciencia E A Tecnologia Portuguese Government Funds                                                                     | 1 |
| Finnish Cultural Foundation                                                                                                                | 1 |
| Finnish Funding Agency For Technology Innovation Tekes                                                                                     | 1 |
| Finnish It Center For Science                                                                                                              | 1 |
| Folktandvarden Ab Region Skane Sweden                                                                                                      | 1 |
| Foundation Foundation For The Study Of Implantology And Oral And Maxillofacial Surgery Badajoz Spain                                       | 1 |
| Foundation Of Ministry Of Education Of China Science And Technology Development Center                                                     | 1 |
| Frq S Fonds De Recherche Quebec Sante                                                                                                      | 1 |
| Fundacao Carlos Chagas Filho De Amparo A Pesquisa Do Estado Do Rio De Janeiro Faperj                                                       | 1 |
| Fundacao De Amparo A Pesquisa Do Estado De Minas Gerais Fapemig                                                                            | 1 |
| Fundacao De Amparo A Pesquisa Do Estado De Sao Paulo Fapesp                                                                                | 1 |
| Gazi University                                                                                                                            | 1 |
| General Electric                                                                                                                           | 1 |
| German Research Foundation Dfg                                                                                                             | 1 |
| Guangdong Province Science And Technology Commission                                                                                       | 1 |
| Harvard Clinical And Translational Science Center National Center For Advancing Translational Sciences National Institutes Of Health Award | 1 |
| Hong Kong Research Grants Council                                                                                                          | 1 |
| Independent Innovation Program Of Jinan Universities And Colleges                                                                          | 1 |
| Innovia                                                                                                                                    | 1 |

|                                                                                                                    |   |
|--------------------------------------------------------------------------------------------------------------------|---|
| Institutes Foundation Of Hospital Of Stomatology Shanxi Medical University                                         | 1 |
| Instrumentarium Science Foundation                                                                                 | 1 |
| Interdisciplinary Program Of Shanghai Jiao Tong University                                                         | 1 |
| International Cooperation Program Of China China                                                                   | 1 |
| International University Of Catalonia Uic                                                                          | 1 |
| Jiangsu Provincial Health Bureau                                                                                   | 1 |
| Kess Knowledge Economy Skills Scholarships                                                                         | 1 |
| Key Technology R D Program Of Sichuan Province                                                                     | 1 |
| Kiat Korea Institute For Advancement Of Technology Korea Government Motie<br>Ministry Of Trade Industry And Energy | 1 |
| King Saud University                                                                                               | 1 |
| King Saud University Vice Deanship Of Research Chairs                                                              | 1 |
| Kirikkale University Bap Unit                                                                                      | 1 |
| Korea Health Technology R D Project Grant Through The Khidi                                                        | 1 |
| Korea Science And Engineering Foundation                                                                           | 1 |
| Korean Research Institute Of Bioscience And Biotechnology                                                          | 1 |
| Libyan Ministry Of Scientific Research And Higher Education Tripoli Libya                                          | 1 |
| Mahsc                                                                                                              | 1 |
| Manam Hospital                                                                                                     | 1 |
| Manchester Academic Health Sciences Centre Mahsc Uk                                                                | 1 |
| Medical Science Research Project Of Henan Province                                                                 | 1 |
| Ministerio Da Ciencia Tecnologia E Ensino Superior Fundacao Para A Ciencia E A<br>Tecnologia Portugal              | 1 |
| Ministry Of Education Science And Technological Development Of The Republic Of<br>Serbia                           | 1 |
| Ministry Of Health Welfare Republic Of Korea                                                                       | 1 |
| Ministry Of Science And Technology Taipei Taiwan                                                                   | 1 |
| Ministry Of Trade Industry Energy Motie Korea Under Industrial Technology<br>Innovation Program                    | 1 |
| Multidisciplinary Team Clinical Research Project Of Ninth People S Hospital                                        | 1 |
| National Basic Research Program Of China                                                                           | 1 |
| National Center For Dental Hygiene Research Practice Usa                                                           | 1 |
| National Centre For Research Development Poland                                                                    | 1 |

|                                                                                                          |   |
|----------------------------------------------------------------------------------------------------------|---|
| National High Technology Research And Development Program China                                          | 1 |
| National Institute For Health Research Nih                                                               | 1 |
| National Institutes Of Health To Innovia Llc Miami Florida                                               | 1 |
| National Metal And Materials Technology Center Mtec                                                      | 1 |
| National Research Foundation South Africa                                                                | 1 |
| National Science Centre Poland Ncn Within The Polonez 3 Fellowship                                       | 1 |
| National Science Foundation Physical Anthropology Hominid                                                | 1 |
| Natural Science Foundation Project Of Cq Cstc                                                            | 1 |
| Nature Science Foundation Of China China                                                                 | 1 |
| New York University College Of Dentistry Usa                                                             | 1 |
| Nih National Institute Of Biomedical Imaging Bioengineering Nibib                                        | 1 |
| Nobel Bio Care                                                                                           | 1 |
| Nobel Biocare                                                                                            | 1 |
| North Carolina State University                                                                          | 1 |
| Oral Health Related Research By Region Skane Odontologisk Forskning I Region Skane Sweden                | 1 |
| Peking Union Medical College                                                                             | 1 |
| Priority Academic Programme Development Of Jiangsu Higher Education Institutions                         | 1 |
| Program Of Increasing The Competitiveness Of Samara National Research University                         | 1 |
| Programa Operacional Regional Do Norte Norte2020 Through Fundo Europeu De Desenvolvimento Regional Feder | 1 |
| Regione Emilia Romagna                                                                                   | 1 |
| Renishaw Plc                                                                                             | 1 |
| Research Discipline Fund                                                                                 | 1 |
| Research Innovation Program For Graduates Of Chinese Academy Of Medical Sciences                         | 1 |
| Research Projects Of National Relevance Prin                                                             | 1 |
| Royal College Of Surgeons Of Edinburgh Uk                                                                | 1 |
| Rural Development Administration Rda                                                                     | 1 |
| Sao Paulo Research Foundation Brazil                                                                     | 1 |
| School Of Dentistry The University Of Manchester Uk                                                      | 1 |
| School Of Medicine Shanghai Jiao Tong University                                                         | 1 |

|                                                                                                            |   |
|------------------------------------------------------------------------------------------------------------|---|
| Science And Technology For Competitive And Sustainable Industries                                          | 1 |
| Science And Technology Program Of Shandong Province                                                        | 1 |
| Scientific Research Council Of Sweden Vetenskapsradet                                                      | 1 |
| Scientific Research Project Fund Of Recep Tayyip Erdogan University Rize Turkey                            | 1 |
| Shanghai Jiao Tong University School Of Medicine                                                           | 1 |
| Shanghai Leading Academic Discipline Project                                                               | 1 |
| Shanghai Scientific And Technological Commission                                                           | 1 |
| Shanghai University                                                                                        | 1 |
| Sjtu Kth Collaborative Research And Development Seed Grants                                                | 1 |
| Southern Implants Irene South Africa                                                                       | 1 |
| Southern Implants South Africa                                                                             | 1 |
| Special Funds For Basic Scientific Research Of Shandong University                                         | 1 |
| Technical University Of Munich Germany                                                                     | 1 |
| U I Corporation                                                                                            | 1 |
| Ucla Center For World Health                                                                               | 1 |
| Ucla Short Term Training Program                                                                           | 1 |
| Undergraduate Teaching Reform And Research Project Of Qilu Medical College Shandong University             | 1 |
| Unitatea Executiva Pentru Finantarea Invatamantului Superior A Cercetarii Dezvoltarii Si Inovarii Uefiscdi | 1 |
| United States Department Of Agriculture Usda                                                               | 1 |
| United States Department Of Defense                                                                        | 1 |
| University Of Ferrara                                                                                      | 1 |
| University Of South Wales Uk                                                                               | 1 |
| Victorian Government Through Its Operational Infrastructure Program                                        | 1 |
| Welsh Government S European Social Fund Esf Convergence Programme For West Wales And The Valleys           | 1 |
| Youth Program Of National Natural Science Foundation Of China                                              | 1 |
